# Supplementary material
Source: PubMed Central journal article supplement (PMC363119)
Supplement: mbc_15_3_1254__1.pdf [file mbc_15_3_1254__1.pdf]

| Gene name                                                         | Acc#      | Gene Symbol    | ChIP-enrichment | Fold-induced expression |
|-------------------------------------------------------------------|-----------|----------------|-----------------|-------------------------|
| hypothetical protein FLJ13063                                     | BC014945  | FLJ13063       | 12.68           | 89.65                   |
| heat shock 70kDa protein 1A                                       | NM_005345 | HSPA1A         | 245.65          | 58.54                   |
| DnaJ (Hsp40) homolog, subfamily C, member 3                       | NM_006260 | DNAJC3         | 0.52            | 49.76                   |
| DnaJ (Hsp40) homolog, subfamily B, member 1                       | NM_006145 | DNAJB1         | 17.12           | 38.72                   |
| heat shock 27kDa protein 2                                        | NM_001541 | HSPB2          | 22.12           | 34.90                   |
| serine proteinase inhibitor, clade H (hsp47), member 2            | NM_001235 | SERPINH2       | 111.29          | 21.53                   |
| heat shock 70kDa protein 6 (HSP70B)                               | NM_002155 | HSPA6          | 312.89          | 20.59                   |
| hypothetical protein DKFZp56410422                                | NM_031435 | DKFZP56410422  | 1.83            | 18.86                   |
| mitochondrial ribosomal protein L18                               | NM_014161 | MRPL18         | 67.66           | 17.16                   |
| chromosome 6 open reading frame 37                                | NM_017633 | C6orf37        | 16.75           | 17.09                   |
| cDNA FLJ37360 fis, clone BRAMY2023358                             | AK094679  | Data not found |                 | 15.33                   |
| DnaJ (Hsp40) homolog, subfamily B, member 4                       | NM_007034 | DNAJB4         | 0.76            | 14.67                   |
| heat shock protein (hsp110 family)                                | NM_014278 | APG-1          | 23.07           | 14.45                   |
| heat shock 105kD                                                  | NM_006644 | HSP105B        | 653.34          | 13.40                   |
| N-acetylated alpha-linked acidic dipeptidase 2                    | NM_005467 | NAALAD2        | 0.33            | 12.29                   |
| cDNA DKFZp434B102                                                 | BC030800  |                | 0.39            | 11.68                   |
| tumor necrosis factor receptor superfamily, member 21             | BC005192  | TNFRSF21       | 31.39           | 10.63                   |
| heat shock 27kDa protein 1                                        | NM_001540 | HSPB1          | 174.23          | 10.11                   |
| relaxin 1 (H1)                                                    | BC005956  | RLN1           | 58.72           | 9.96                    |
| Homo sapiens cDNA: FLJ21243 fis, clone COL01164                   | AK024896  |                |                 | 7.74                    |
| solute carrier family 28, member 1                                | NM_004213 | SLC28A1        | 0.20            | 6.56                    |
| death effector domain-containing DNA binding protein 2            | BC013372  | DEDD2          | 13.98           | 6.44                    |
| Homo sapiens clone 24627 mRNA sequence                            | AF070618  |                |                 | 6.18                    |
| tripartite motif-containing 26                                    | BC032297  | TRIM26         |                 | 6.10                    |
| DKFZP43411735 protein                                             | AB037737  | DKFZP43411735  | 0.30            | 5.88                    |
| collagen, type IV, alpha 6                                        | NM_033641 | COL4A6         | 6.07            | 5.69                    |
| crystallin, mu                                                    | NM_001888 | CRYM           | 4.37            | 5.60                    |
| FK506 binding protein 4, 59kDa                                    | NM_002014 | FKBP4          | 6.28            | 5.24                    |
| hypothetical protein FLJ22693                                     | NM_022750 | FLJ22693       | 9.26            | 4.95                    |
| crystallin, beta A4                                               | NM_001886 | CRYBA4         | 29.57           | 4.68                    |
| ubiquitin B                                                       | BC015127  | UBB            | 347.68          | 4.46                    |
| DnaJ (Hsp40) homolog, subfamily B, member 6                       | AL832124  | DNAJB6         |                 | 4.37                    |
| protein kinase anchoring protein GKAP2                            | NM_025211 | GKAP2          | 0.24            | 4.14                    |
| ribosomal protein S14                                             | BC006784  | RPS14          | 6.54            | 3.85                    |
| cDNA FLJ39749 fis, clone SMINT2017599                             | AK097068  |                |                 | 3.81                    |
| p21 (CDKN1A)-activated kinase 2                                   | NM_002577 | PAK2           |                 | 3.81                    |
| hypothetical protein MGC10814                                     | NM_032671 | MGC10814       | 16.49           | 3.79                    |
| GPI anchored molecule like protein                                | NM_002066 | GML            | 55.60           | 3.75                    |
| DnaJ (Hsp40) homolog, subfamily B, member 6                       | NM_005494 | DNAJB6         | 70.75           | 3.68                    |
| heat shock 70kDa protein 1-like                                   | NM_005527 | HSPA1L         | 238.60          | 3.47                    |
| wingless-type MMTV integration site family, member 4              | NM_030761 | WNT4           |                 | 3.45                    |
| ESTs                                                              | AI023475  |                |                 | 3.44                    |
| glioblastoma amplified sequence                                   | BC001837  | GBAS           | 35.49           | 3.42                    |
| MHC class I polypeptide-related sequence A                        | NM_000247 | MICA           | 45.89           | 3.34                    |
| G protein-coupled receptor 4                                      | NM_005282 | GPR4           | 44.42           | 3.29                    |
| fucosyltransferase 1                                              | NM_000148 | FUT1           | 0.65            | 3.24                    |
| heat shock 27kDa protein 3                                        | NM_006308 | HSPB3          | 0.32            | 3.19                    |
| cysteine-rich, angiogenic inducer, 61                             | BC009199  | CYR61          | 1.70            | 3.18                    |
| protein kinase C, alpha                                           | NM_002737 | PRKCA          | 0.35            | 3.16                    |
| hypothetical protein LOC63929                                     | NM_022098 | LOC63929       | 159.88          | 3.14                    |
| hypothetical protein FLJ20558                                     | NM_017880 | FLJ20558       | 1.04            | 3.04                    |
| heat shock 90kDa protein 1, beta                                  | NM_007355 | HSPCB          | 220.28          | 2.96                    |
| Siah-interacting protein                                          | BC005975  | SIP            | 60.99           | 2.94                    |
| ESTs, Weakly similar to L1 repeat, [Mus musculus]                 | AI741106  |                |                 | 2.94                    |
| hypothetical protein P15-2                                        | NM_018698 | NXT2           | 241.38          | 2.92                    |
| Homo sapiens cDNA FLJ13997 fis, clone Y79AA1002220                | AK024059  |                |                 | 2.92                    |
| TAF7, TBP-associated factor, 55kDa                                | NM_005642 | TAF7           | 116.50          | 2.81                    |
| AF464140                                                          | NM_145034 | LOC163590      |                 | 2.79                    |
| suppressor of G2 allele of SKP1, S. cerevisiae, homolog of        | NM_006704 | SUGT1          | 13.18           | 2.72                    |
| hypothetical protein MGC8721                                      | NM_016127 | MGC8721        | 41.74           | 2.66                    |
| nuclear receptor coactivator 3                                    | NM_006534 | NCOA3          | 1.63            | 2.62                    |
| brain-specific protein p25 alpha                                  | NM_007030 | p25            | 0.62            | 2.62                    |
| ESTs, similar to hypothetical protein FLJ11220 [Homo sapiens]     | BM546166  | NROB1          |                 | 2.60                    |
| ESTs                                                              | W88881    | Data not found |                 | 2.56                    |
| chromosome 14 open reading frame 3                                | NM_012111 | C14orf3        | 36.45           | 2.56                    |
| ESTs, similar to 2109260A B cell growth factor [Homo sapiens]     | BM016400  | GRP58          |                 | 2.55                    |
| ESTs                                                              | BF724210  |                |                 | 2.54                    |
| myotubularin related protein 8                                    | BC012399  | MTMR8          | 5.92            | 2.52                    |
| stress-induced-phosphoprotein 1 (Hsp70/Hsp90-organizing protein)  | BC002987  | STIP1          | 226.45          | 2.48                    |
| ESTs                                                              | NS0733    |                |                 | 2.46                    |
| hypothetical protein BC009514                                     | AK098237  | LOC127253      |                 | 2.38                    |
| PR domain containing 2, with ZNF domain                           | NM_012231 | PRDM2          | 0.47            | 2.38                    |
| CDC-like kinase 4                                                 | NM_020666 | CLK4           | 0.36            | 2.32                    |
| Homo sapiens cDNA FLJ11174 fis, clone PLACE1007367                | AK002036  |                |                 | 2.29                    |
| Homo sapiens cDNA FLJ32453 fis, clone SKMUS2001703                | AK057015  |                |                 | 2.29                    |
| ESTs                                                              | BE787384  |                |                 | 2.25                    |
| coagulation factor VIII, procoagulant component (hemophilia A)    | NM_000132 | F8             | 21.39           | 2.19                    |
| ESTs                                                              | BQ025398  |                |                 | 2.19                    |
| VCY2 interacting protein 1                                        | BC008806  | VCY2IP1        | 0.47            | 2.18                    |
| suppression of tumorigenicity 13 (Hsp70 interacting protein)      | NM_003932 | ST13           | 174.17          | 2.17                    |
| hypothetical protein FLJ10830                                     | BC003176  | FLJ10830       | 21.30           | 2.15                    |
| heat shock 10kDa protein 1 (chaperonin 10)                        | NM_002157 | HSPE1          | 154.26          | 2.14                    |
| ESTs, similar to hypothetical protein FLJ20378 [Homo sapiens]     | BF679873  |                |                 | 2.09                    |
| crystallin, gamma D                                               | NM_006891 | CRYGD          | 3.76            | 2.06                    |
| fragile X mental retardation, autosomal homolog 1                 | NM_005087 | FXR1           | 26.53           | 2.06                    |
| crystallin, beta A1                                               | NM_005208 | CRYBA1         | 0.74            | 2.06                    |
| crystallin, beta B3                                               | NM_004076 | CRYBB3         | 0.28            | 2.04                    |
| fibroblast growth factor 18                                       | BC006245  | FGF18          | 8.01            | 2.03                    |
| CHORD-containing, zinc binding protein 1                          | NM_012124 | CHORDC1        | 104.88          | 2.03                    |
| crystallin, gamma A                                               | NM_014617 | CRYGA          | 1.18            | 1.99                    |
| fizzled homolog 4 (Drosophila)                                    | NM_012193 | FZD4           | 15.20           | 1.97                    |
| clone MGC:15478 IMAGE:2967661, mRNA                               | BC010426  |                | 1.11            | 1.97                    |
| ESTs, similar to hypothetical protein FLJ20489 [Homo sapiens]     | BQ186420  |                |                 | 1.96                    |
| heat shock 60kDa protein 1 (chaperonin)                           | NM_002156 | HSPD1          | 415.79          | 1.95                    |
| MORF-related gene X                                               | NM_012286 | MRGX           | 11.75           | 1.94                    |
| TEA domain family member 1 (SV40 transcriptional enhancer factor) | AL833289  | TEAD1          | 0.18            | 1.93                    |
| retinoblastoma binding protein 2                                  | NM_005056 | RBBP2          | 72.94           | 1.89                    |
| carboxypeptidase E                                                | NM_001873 | CPE            | 19.95           | 1.89                    |
| SBB126 protein                                                    | NM_018846 | SBB126         | 0.24            | 1.87                    |
| carbohydrate (chondroitin 6) sulfotransferase 3                   | NM_004273 | CHST3          | 0.46            | 1.87                    |
| TALI (SCL) interrupting locus                                     | NM_003035 | SIL            | 0.52            | 1.87                    |
| crystallin, beta B2                                               | NM_000496 | CRYBB2         | 0.94            | 1.86                    |
| peptidylprolyl isomerase D (cyclophilin D)                        | NM_005038 | PPID           | 8.93            | 1.85                    |
| hypothetical protein FLJ13936                                     | AK096157  | FLJ25416       |                 | 1.84                    |
| heat shock 70kDa protein 8                                        | NM_006597 | HSPA8          | 191.34          | 1.83                    |
| EST                                                               | AI149051  |                |                 | 1.83                    |
| crystallin, zeta (quinone reductase)                              | NM_001889 | CRYZ           |                 | 1.82                    |
| WEE1+ homolog (S. pombe)                                          | NM_003390 | WEE1           | 0.35            | 1.80                    |
| chaperonin containing TCP1, subunit 4 (delta)                     | NM_006430 | CCT4           | 108.93          | 1.77                    |
| ATPase, Ca++ transporting, type 2C, member 1                      | NM_014382 | ATP2C1         | 33.12           | 1.77                    |
| DnaJ (Hsp40) homolog, subfamily A, member 1                       | NM_001539 | DNAJA1         | 325.10          | 1.76                    |

|                                                                        |           |                |        |
|------------------------------------------------------------------------|-----------|----------------|--------|
| cDNA FLJ25921, similar to Tandem PH Domain Containing Protein-2        | AK098787  | PLEKHA2        | 1.73   |
| cDNA DKFp761B128                                                       | AL834266  | DKFp761B128    | 1.71   |
| ESTs, similar to zinc finger protein 91 (HPF7, HTF10) [Homo sapiens]   | AA169259  |                | 1.70   |
| homeodomain interacting protein kinase 3                               | NM_005734 | HIPK3          | 0.26   |
| similar to BLAST-1 precursor (BCM1 surface antigen), clone MGC:34      | BC030224  |                | 1.69   |
| Homo sapiens, clone IMAGE:4617948, mRNA                                | AK095225  |                | 1.67   |
| forkhead box J1                                                        | NM_001454 | FOXJ1          | 9.76   |
| serine hydrolase-like                                                  | NM_014509 | dJ222E13.1     | 54.05  |
| WD-repeat protein                                                      | NM_005828 | HAN11          | 0.35   |
| zinc finger protein 184 (Kruppel-like)                                 | BC022992  | ZNF184         | 1.62   |
| ESTs                                                                   | BG252605  |                | 1.62   |
| heterogeneous nuclear ribonucleoprotein A2/B1                          | NM_002137 | HNRPA2B1       | 55.24  |
| KIAA0721 protein                                                       | BC009116  | KIAA0721       | 16.37  |
| ethanolamine kinase                                                    | NM_018638 | EK11           | 1.60   |
| crystallin, gamma 5                                                    | NM_017541 | CRYG5          | 0.56   |
| cDNA DKFZp434j11313                                                    | AL137262  |                | 1.54   |
| KIAA0999 protein                                                       | NM_025164 | KIAA0999       | 12.69  |
| inactive progesterone receptor, 23 kD                                  | BC003005  | TEBP           | 80.55  |
| heat shock 70kDa protein 5 (glucose-regulated protein, 78kDa)          | NM_005347 | HSPA5          | 1.07   |
| KIAA0931 protein                                                       | AB023148  | KIAA0931       | 1.47   |
| hypothetical protein My014                                             | AB007957  | MY014          | 1.43   |
| thioredoxin                                                            | NM_003329 | TXN            | 0.60   |
| Homo sapiens cDNA FLJ39218 fis, clone OCBBF2006660                     | AK096537  |                | 1.42   |
| KIAA0630 protein                                                       | AB014530  | Nbak2          | 1.41   |
| Wolf-Hirschhorn syndrome candidate 1-like 1                            | NM_023034 | WHSC1L1        | 1.41   |
| PI-3-kinase-related kinase SMG-1                                       | NM_015092 | SMG1           | 1.41   |
| synaptosomal-associated protein, 23kDa                                 | BC000148  | SNAP23         | 30.44  |
| SR rich protein                                                        | NM_032870 | DKFZp564B0769  | 1.40   |
| Homo sapiens cDNA FLJ37789 fis, clone BRHIP3000081                     | AK095108  |                | 1.39   |
| protein phosphatase 1, catalytic subunit, gamma isoform                | NM_002710 | PPP1CC         | 1.39   |
| ESTs                                                                   | H28794    |                | 1.36   |
| tumor necrosis factor (ligand) superfamily, member 13                  | NM_003808 | TNFSF13        | 1.36   |
| crystallin, lambda 1                                                   | NM_015974 | CRYL1          | 1.35   |
| crystallin, gamma C                                                    | NM_020989 | CRYGC          | 1.35   |
| PTD002 protein                                                         | NM_016144 | PTD002         | 1.35   |
| DnaJ (Hsp40) homolog, subfamily B, member 9                            | NM_012328 | DNAJB9         | 0.70   |
| heat shock protein 75                                                  | NM_016292 | TRAP1          | 0.45   |
| nucleolar protein NOP5/NOP58                                           | NM_015934 | NOP5/NOP58     | 158.68 |
| cell division cycle 25A                                                | NM_001789 | CDC25A         | 1.30   |
| hypothetical protein BC008988                                          | BC008988  | LOC91937       | 0.57   |
| hypothetical protein FLJ33282                                          | AB053301  | FLJ33282       | 1.29   |
| DnaJ (Hsp40) homolog, subfamily C, member 6                            | NM_014787 | DNAJC6         | 0.79   |
| Homo sapiens cDNA FLJ40369 fis, clone TESTI2034847                     | AK097688  |                | 1.28   |
| hypothetical protein FLJ10482                                          | NM_018107 | RNPC4          | 87.16  |
| KIAA1970 protein                                                       | AL832489  | KIAA1970       | 1.27   |
| diacylglycerol kinase, epsilon 64kDa                                   | NM_003647 | DGKE           | 124.74 |
| clone MGC:9852 IMAGE:3865825, mRNA                                     | BC009051  | Data not found | 0.01   |
| CD48 antigen (B-cell membrane protein)                                 | BC016182  | CD48           | 196.45 |
| hypothetical protein FLJ20422                                          | BC005210  | FLJ20422       | 17.37  |
| mitochondrial carrier homolog 1                                        | NM_014341 | MTCH1          | 1.25   |
| clone MGC:27375 IMAGE:4688423, mRNA                                    | BC017422  |                | 46.55  |
| hypothetical protein BC013949                                          | NM_138442 | LOC115098      | 1.24   |
| formin-binding protein 17                                              | AL049935  | FBNP1          | 1.24   |
| eukaryotic translation initiation factor 2B, subunit 5 epsilon, 82kDa  | BC013590  | EIF2B5         | 26.71  |
| heat shock 70kDa protein 2                                             | NM_021979 | HSPA2          | 0.47   |
| ribosomal protein L10a                                                 | BC006791  | RPL10A         | 10.56  |
| apoptotic chromatin condensation inducer in the nucleus                | NM_014977 | ACINUS         | 1.23   |
| ribosomal protein L34                                                  | NM_033625 | RPL34          | 45.91  |
| tumor-associated calcium signal transducer 1                           | NM_002354 | TACSTD1        | 12.80  |
| heat shock 70kDa protein 9B (mortalin-2)                               | BC000478  | HSPA9B         | 48.40  |
| EST                                                                    | AA127063  |                | 1.20   |
| hypothetical protein MGC4308                                           | NM_032359 | MGC4308        | 7.29   |
| crystallin, beta A2                                                    | NM_057094 | CRYBA2         | 1.19   |
| CD47 antigen (integrin-associated signal transducer)                   | NM_001777 | CD47           | 1.19   |
| phosphatidylinositol-4-phosphate 5-kinase, type 1, alpha               | NM_003557 | PIP5K1A        | 1.19   |
| kelch-like protein C3IP1                                               | BC004175  | C3IP1          | 1.17   |
| DnaJ (Hsp40) homolog, subfamily B, member 11                           | NM_016306 | DNAJB11        | 1.01   |
| tubby like protein 3                                                   | BC032587  | TULP3          | 1.17   |
| MBD2 (methyl-CpG-binding protein)-interacting zinc finger protein      | BC001073  | MIZF           | 1.05   |
| F-box and WD-40 domain protein 1B                                      | NM_012300 | FBXW1B         | 1.15   |
| cDNA FLJ10023, moderately similar to KIAA0411                          | AK057565  |                | 1.15   |
| catenin, beta interacting protein 1                                    | BC014300  |                | 4.92   |
| adaptor-related protein complex 2, beta 1 subunit                      | NM_001282 | AP2B1          | 1.14   |
| crystallin, beta B1                                                    | NM_001887 | CRYBB1         | 1.13   |
| MCM4 minichromosome maintenance deficient 4 (S. cerevisiae)            | X74794    | MCM4           | 1.13   |
| hypothetical protein FLJ10404                                          | BC008784  | FLJ10404       | 0.92   |
| chromosome 22 open reading frame 2                                     | BC016139  | C22orf2        | 5.15   |
| amplified in osteosarcoma                                              | BC007254  | OS-9           | 0.91   |
| guanine nucleotide binding protein 4                                   | NM_004485 | GNG4           | 18.65  |
| Similar to histamine N-methyltransferase, clone MGC:14500              | BC005907  |                | 23.00  |
| inactive progesterone receptor, 23 kD                                  | NM_006601 | TEBP           | 1.08   |
| ATPase inhibitor precursor                                             | BC001867  | ATPIF1         | 1.21   |
| splicing factor, arginine/serine-rich 10 (transformer 2 homolog, Dros) | BC005898  | SFRS10         | 70.26  |
| hypothetical protein MGC3036                                           | BC001354  | MGC3036        | 1.56   |
| tRNA isopentenylpyrophosphate transferase                              | NM_017646 | IPT            | 16.14  |
| CD2 antigen (cytoplasmic tail) binding protein 2                       | AB033004  | CD2BP2         | 1.04   |
| v-crk sarcoma virus CT10 oncogene homolog (avian)                      | NM_016823 | CRK            | 1.03   |
| heat shock factor binding protein 1                                    | BC007515  | HSPB1          | 0.13   |
| mannosidase, alpha, class 2B, member 1                                 | BC007362  |                | 1.03   |
| C-terminal PDZ domain ligand of neuronal nitric oxide synthase         | AB007933  | CAPON          | 1.03   |
| hypothetical protein MGC2474                                           | BC001361  | MGC2474        | 19.18  |
| Huntingtin interacting protein K                                       | NM_016400 | HYPK           | 85.42  |
| hypothetical protein FLJ22369                                          | NM_032221 | CHD5           | 7.72   |
| chaperonin containing TCP1, subunit 3 (gamma)                          | BC008019  | CCT3           | 1.00   |
| ferritin, light polypeptide                                            | BC004245  | FTL            | 70.46  |
| hypothetical protein MGC10814                                          | BC004943  | MGC10814       | 18.44  |
| chromosome 9 open reading frame 16                                     | BC008887  | C9orf16        | 0.72   |
| DnaJ (Hsp40) homolog, subfamily B, member 5                            | NM_012266 | DNAJB5         | 0.50   |
| peroxisomal membrane protein 2, 22kDa                                  | BC009836  | PXMP2          | 0.70   |
| hypothetical protein HSPC219                                           | BC002863  | HSPC219        | 1.51   |
| cleavage and polyadenylation specific factor 2, 100kDa                 | AK001627  | Data not found | 0.98   |
| DnaJ (Hsp40) homolog, subfamily C, member 8                            | NM_014280 | DNAJC8         | 0.88   |
| hypothetical protein FLJ20360                                          | AL832762  | FLJ20360       | 0.97   |
| EST, Highly similar to densin-180 [Homo sapiens]                       | AA609242  |                | 0.96   |
| kallikrein 10                                                          | NM_002776 | KLK10          | 0.96   |
| benzodiazepine receptor (peripheral)                                   | BC001110  | BZRP           | 0.27   |
| KIAA1948 protein                                                       | AB075828  | KIAA1948       | 0.95   |
| KIAA0261 protein                                                       | D87450    | KIAA0261       | 0.95   |
| proliferation-associated 2G4, 38kDa                                    | BC001951  | PA2G4          | 0.07   |
| microsomal glutathione S-transferase 1                                 | BC005923  | MGST1          | 17.70  |
| eukaryotic translation initiation factor 5                             | BC007728  | EIF5           | 38.47  |
| mitotic phosphoprotein 44                                              | NM_138285 | LOC129401      | 0.94   |

|                                                                         |           |                |       |         |
|-------------------------------------------------------------------------|-----------|----------------|-------|---------|
| sarcolemma associated protein                                           | AB046821  | SLMAP          |       | 0.93    |
| ribosomal protein S6                                                    | BC009427  | RPS6           | 0.11  | 0.93    |
| hypothetical protein MGC4701                                            | BC003648  | MGC4701        |       | 0.93    |
| signal recognition particle 54kDa                                       | BC003389  | SRP54          | 1.64  | 0.93    |
| torsin family 1, member B (torsin B)                                    | BC015578  | TOR1B          | 0.61  | 0.91    |
| tumor rejection antigen (gp96) 1                                        | BC009195  | TRA1           | 0.52  | 0.90    |
| hypothetical protein HSPC228                                            | BC005937  | HSPC228        | 2.46  | 0.89    |
| hypothetical protein FLJ10482                                           | BC002566  | RNPC4          | 0.96  | 0.89    |
| serine proteinase inhibitor, clade B (ovalbumin), member 1              | BC009015  | SERPINB1       | 0.19  | 0.88    |
| hypothetical protein PRO1853                                            | BC004548  | PRO1853        | 0.77  | 0.87    |
| nucleoporin 88kDa                                                       | BC000335  | NUP88          | 28.71 | 0.86    |
| crystallin, zeta (quinone reductase)-like 1                             | NM_005111 | CRYZL1         |       | 0.86    |
| H19, imprinted maternally expressed untranslated mRNA                   | BC007513  | H19            | 8.19  | 0.84    |
| DnaJ (Hsp40) homolog, subfamily C, member 4                             | NM_005528 | DNAJC4         |       | 0.84    |
| similar to arginyl-tRNA synthetase                                      | BC010420  | LOC57038       | 0.93  | 0.84    |
| aconitase 2, mitochondrial                                              | NM_001098 | ACO2           | 14.67 | 0.84    |
| ATPase, H+ transporting, lysosomal 31kDa, V1 subunit E-like 2 isoform 1 | BC008981  | ATP6V1E2       | 0.45  | 0.82    |
| karyopherin (importin) beta 1                                           | L38951    | KPNB1          |       | 0.82    |
| stromal cell-derived factor 2                                           | BC001406  | SDF2           | 0.53  | 0.81    |
| DNA (cytosine-5-)-methyltransferase 2                                   | NM_004412 | DNMT2          | 19.35 | 0.81    |
| BBP-like protein 2                                                      | BC008873  | BLP2           | 60.77 | 0.80    |
| hypothetical protein MGC21990                                           | BC015422  | ANKRD59        | 45.95 | 0.79    |
| hypothetical protein FLJ10352                                           | NM_032142 | FLJ10352       | 11.47 | 0.79    |
| DnaJ (Hsp40) homolog, subfamily B, member 12                            | NM_017626 | DNAJB12        | 1.30  | 0.78    |
| Homo sapiens EST from clone 37208, full insert                          | AL355686  |                |       | 0.78    |
| excision repair cross-complementing, group 2 (x. pigmentosum D)         | BC008346  | ERCC2          | 0.57  | 0.78    |
| ceramide kinase                                                         | NM_022766 | CERK           |       | 0.77    |
| cytochrome b5 reductase b5R.2                                           | NM_016229 | CYB5R2         |       | 0.76    |
| zinc finger protein 359                                                 | BC007256  | ZNF23          | 0.88  | 0.75    |
| cutaneous T-cell lymphoma tumor antigen se70-2                          | BC000791  | SE70-2         | 0.43  | 0.75    |
| interferon, alpha 16                                                    | NM_002173 | IFNA16         | 19.22 | 0.75    |
| chromosome 21 open reading frame 51                                     | NM_058182 | C21orf51       | 55.88 | 0.74    |
| protease, serine, 12 (neurotrypsin, motopsin)                           | NM_003619 | PRSS12         |       | 0.71    |
| hypothetical protein FLJ10468                                           | BC001651  | FLJ10468       | 0.61  | 0.69    |
| interleukin 8                                                           | NM_000584 | IL8            | 0.52  | 0.68    |
| inhibitor of growth family, member 3                                    | BC009777  | ING3           | 2.40  | 0.67    |
| peroxiredoxin 3                                                         | BC008038  | PRDX3          | 6.34  | 0.66    |
| putative N6-DNA-methyltransferase                                       | NM_013240 | N6AMT1         |       | 0.66    |
| mutS homolog 5 (E. coli)                                                | BC001358  | MSH5           | 1.22  | 0.65    |
| dystonia 1, torsion (autosomal dominant; torsin A)                      | BC000674  | DYT1           | 1.14  | 0.65    |
| tripartite motif-containing 39                                          | BC007661  | TRIM39         | 0.37  | 0.60    |
| ESTs                                                                    | H08304    |                |       | 0.60    |
| activating transcription factor 5                                       | BC005174  | ATF5           | 2.64  | 0.59    |
| ESTs                                                                    | BF038515  |                |       | 0.57    |
| serine/threonine kinase 35                                              | AK024394  | STK35          |       | 0.57    |
| Homo sapiens clone 23556 mRNA sequence                                  | AF035290  |                |       | 0.54    |
| component of oligomeric golgi complex 7                                 | BC000549  | COG7           |       | 0.53    |
| KIAA1387 protein                                                        | AB037808  | KIAA1387       |       | 0.51    |
| RAS p21 protein activator (GTPase activating protein) 1                 | NM_002890 | RASA1          |       | 0.51    |
| ESTs, similar to hypothetical protein FLJ20489 [Homo sapiens]           | BM909488  |                |       | 0.51    |
| hypothetical protein FLJ22570                                           | BC004867  | FLJ22570       | 0.39  | 0.50    |
| hypothetical protein MGC4606                                            | BC003640  | MGC4606        | 0.80  | 0.49    |
| ESTs                                                                    | BG564282  |                |       | 0.46    |
| ESTs                                                                    | BI020159  |                |       | 0.44    |
| DKFZP434D1335 protein                                                   | AK027643  | DKFZP434D1335  |       | 0.38    |
| ESTs                                                                    | N46723    | Data not found |       | 0.37    |
| KIAA0449 protein                                                        | AB007918  | KIAA0449       |       | 0.35    |
| sphingosine-1-phosphate lyase 1                                         | AB033078  | SGPL1          |       | 0.32    |
| crystallin, alpha B                                                     | BC007008  | CRYAB          | 4.31  | -239.40 |
| abhydrolase domain containing 3                                         | NM_138340 | ABHD3          | 0.77  |         |
| ADP-ribosyltransferase (NAD+; poly (ADP-ribose) polymerase)-like 1      | NM_006437 | ADPRTL1        | 2.93  |         |
| aldehyde dehydrogenase 6 family, member A1                              | BC004909  | ALDH6A1        | 0.63  |         |
| adaptor-related protein complex 3, mu 2 subunit                         | NM_006803 | AP3M2          | 0.83  |         |
| ADP-ribosylation factor 5                                               | BC003043  | ARF5           | 0.77  |         |
| actin related protein M1                                                | BC007289  | ARPM1          | 8.72  |         |
| acetylserotonin O-methyltransferase                                     | NM_004043 | ASMT           | 0.76  |         |
| ATPase, Na+/K+ transporting, beta 3 polypeptide                         | BC011835  | ATP1B3         | 1.18  |         |
| ATPase, Ca++ transporting, plasma membrane 3                            | NM_021949 | ATP2B3         | 22.63 |         |
| B7 homolog 3                                                            | NM_025240 | B7-H3          | 1.21  |         |
| BCL2-associated athanogene 3                                            | NM_004281 | BAG3           | 23.37 |         |
| beta-carotene dioxygenase 2                                             | NM_031938 | BCDO2          | 3.36  |         |
| chromosome 17 open reading frame 1A                                     | NM_031456 | C17orf1A       | 2.95  |         |
| chromosome 1 open reading frame 2                                       | NM_006589 | C1orf2         | 1.27  |         |
| chromosome 21 open reading frame 62                                     | NM_019596 | C21orf62       | 3.86  |         |
| chromosome 4 open reading frame 6                                       | NM_005750 | C4orf6         | 8.87  |         |
| chromosome 6 open reading frame 10                                      | NM_006781 | C6orf10        | 1.86  |         |
| chromosome 6 open reading frame 37                                      | BC007351  | C6orf37        | 0.28  |         |
| calcium channel, voltage-dependent, L type, alpha 1C subunit            | NM_000719 | CACNA1C        |       | 0.46    |
| calneuron 1                                                             | NM_031468 | CALN1          |       | 0.46    |
| calpain 3, (p94)                                                        | BC003169  | CAPN3          |       | 0.37    |
| calcium-sensing receptor                                                | NM_000388 | CASR           |       | 3.01    |
| chemokine (C-C motif) ligand 20                                         | NM_004591 | CCL20          |       | 5.55    |
| cyclin D3                                                               | BC011616  | CCND3          |       | 0.62    |
| CD69 antigen (p60, early T-cell activation antigen)                     | BC007037  | CD69           |       | 1.13    |
| cyclin-dependent kinase 5, regulatory subunit 2 (p39)                   | NM_003936 | CDK5R2         |       |         |
| centromere protein A, 17kDa                                             | BC000881  | CENPA          |       | 0.56    |
| hypothetical protein from BCRA2 region                                  | BC010643  | CG005          |       | 1.02    |
| CGI-31 protein                                                          | NM_015959 | CGI-31         |       | 4.13    |
| choroideremia-like (Rab escort protein 2)                               | NM_001821 | CHML           |       | 0.49    |
| CDC28 protein kinase 2                                                  | BC006458  | CKS2           |       | 0.48    |
| C-type lectin-like receptor-1                                           | NM_016511 | CLEC1          |       | 0.52    |
| collagen, type VI, alpha 3                                              | NM_004369 | COL6A3         |       | 1.93    |
| cystatin SN                                                             | NM_001898 | CST1           |       | 3.63    |
| cystatin SA                                                             | NM_001322 | CST2           |       | 6.13    |
| cystatin S                                                              | NM_001899 | CST4           |       | 2.33    |
| catenin (cadherin-associated protein), delta 1                          | NM_001331 | CTNND1         |       | 0.70    |
| cytochrome P450, subfamily XXXIX, polypeptide 1                         | BC010358  | CYP39A1        |       | 0.40    |
| ESTs                                                                    | BE928544  | Data not found |       |         |
| ESTs                                                                    | R55848    | Data not found |       |         |
| ESTs, Weakly similar to endogenous retroviral family W, env(C7), m      | BE883514  | Data not found |       |         |
| tetraspanin similar to TM4SF9                                           | BC002920  | DC-TM4F2       |       | 1.59    |
| KIAA1885 protein                                                        | BC008844  | DKFZP434L1435  |       | 0.24    |
| hypothetical protein DKFZp434N0650                                      | BC009497  | DKFZp434N0650  |       | 2.04    |
| DKFZP564D116 protein                                                    | BC009494  | DKFZP564D116   |       | 0.77    |
| DKFZP586G1517 protein                                                   | BC017477  | DKFZP586G1517  |       | 1.34    |
| hypothetical protein DKFZp761F2014                                      | NM_020215 | DKFZp761F2014  |       | 3.52    |
| similar to MRJ gene for a member of the DNAJ protein family (H. sar     | NM_058246 | DNAJB6         |       | 1.70    |
| down-regulator of transcription 1, TBP-binding (negative cofactor 2)    | AL833729  | DR1            |       |         |
| ectodysplasin 1, anhidrotic receptor                                    | NM_022336 | EDAR           |       |         |
| Fc fragment of IgG, low affinity IIIa, receptor for (CD16)              | NM_000569 | FCGR3A         |       | 0.51    |
| complement factor H related 3                                           | NM_021023 | FHR-3          |       | 1.82    |
| hypothetical protein FKSG44                                             | NM_031904 | FKSG44         |       | 0.54    |

|                                                                            |           |          |        |
|----------------------------------------------------------------------------|-----------|----------|--------|
| cDNA FLJ00103                                                              | BC012332  | FLJ00103 | 29.18  |
| hypothetical protein FLJ11078                                              | NM_018316 | FLJ11078 | 2.12   |
| hypothetical protein FLJ11715                                              | NM_024564 | FLJ11715 | 1.00   |
| hypothetical protein FLJ13441                                              | NM_023924 | FLJ13441 | 5.23   |
| hypothetical protein FLJ13881                                              | NM_024729 | FLJ13881 | 0.04   |
| hypothetical protein FLJ14126                                              | NM_024849 | FLJ14126 | 7.77   |
| hypothetical protein FLJ14981                                              | NM_032868 | FLJ14981 | 2.08   |
| hypothetical protein FLJ20323                                              | NM_019005 | FLJ20323 | 0.97   |
| hypothetical protein FLJ20333                                              | AB037754  | FLJ20333 |        |
| hypothetical protein FLJ20417                                              | NM_017810 | FLJ20417 | 0.59   |
| hypothetical protein FLJ20950                                              | NM_024952 | FLJ20950 | 1.47   |
| hypothetical protein FLJ21616                                              | BC009259  | FLJ21616 | 0.15   |
| hypothetical protein FLJ23018                                              | NM_024810 | FLJ23018 | 0.52   |
| hypothetical protein FLJ23594                                              | NM_024781 | FLJ23594 | 0.53   |
| FX1D domain containing ion transport regulator 2                           | BC013289  | FX1D2    | 9.65   |
| guanine deaminase                                                          | NM_004293 | GDA      | 0.75   |
| gap junction protein, beta 3, 31kDa (connexin 31)                          | BC012918  | GJB3     | 0.27   |
| gelpl phosphoprotein 2                                                     | NM_016548 | GOLPH2   | 0.74   |
| G protein-coupled receptor 7                                               | NM_005285 | GPR7     | 0.19   |
| G protein-coupled receptor, family C, group 5, member B                    | NM_016235 | GPRCSB   | 2.96   |
| heme oxygenase (decycling) 1                                               | NM_002133 | HMOX1    | 5.83   |
| heterogeneous nuclear ribonucleoprotein K                                  | BC000355  | HNRPK    | 1.44   |
| hypothetical protein HSPC111                                               | NM_016391 | HSPC111  | 4.62   |
| hypothetical protein HSPC138                                               | BC015991  | HSPC138  | 0.53   |
| islet amyloid polypeptide                                                  | NM_000415 | IAPP     | 0.68   |
| interferon, gamma-inducible protein 16                                     | BC017059  | IFI16    | 0.49   |
| interferon gamma receptor 2 (interferon gamma transducer 1)                | BC003624  | IFNGR2   | 0.49   |
| interleukin 18 binding protein                                             | NM_005699 | IL18BP   | 3.67   |
| inactivation escape 1                                                      | NM_003669 | INE1     | 0.32   |
| integrin, alpha M                                                          | NM_000632 | ITGAM    | 5.70   |
| potassium voltage-gated channel, shaker-related subfamily, beta member 2   | NM_003636 | KCNAB2   | 3.17   |
| potassium voltage-gated channel, subfamily G, member 2                     | NM_012283 | KCNG2    | 0.57   |
| KIAA0102 gene product                                                      | BC008063  | KIAA0102 | 0.30   |
| KIAA0410 gene product                                                      | NM_014778 | KIAA0410 | 0.49   |
| KIAA0663 gene product                                                      | NM_014827 | KIAA0663 | 0.40   |
| KIAA0971 protein                                                           | BC001544  | KIAA0971 | 0.38   |
| KIAA1049 protein                                                           | BC011884  | KIAA1049 | 12.59  |
| densin-180                                                                 | NM_020794 | KIAA1365 | 2.26   |
| lymphocyte-specific protein tyrosine kinase                                | BC013200  | LCK      | 0.28   |
| leukocyte receptor cluster (LRC) member 4                                  | BC002512  | LENG4    | 0.30   |
| lectin, galactoside-binding, soluble, 3 (galectin 3)                       | NM_002306 | LGALS3   | 0.26   |
| hypothetical protein LOC51061                                              | NM_015914 | LOC51061 | 0.60   |
| similar to prokaryotic-type class I peptide chain release factors          | BC014428  | LOC54516 | 3.79   |
| KIAA1634 protein                                                           | AB046854  | MAGI-3   |        |
| mastermind-like 1 (Drosophila)                                             | NM_014757 | MAML1    |        |
| microtubule-associated protein 2                                           | NM_002374 | MAP2     | 2.09   |
| hypothetical protein MGC10820                                              | BC004269  | MGC10820 | 0.26   |
| hypothetical protein MGC13183                                              | NM_032358 | MGC13183 | 0.48   |
| hypothetical gene MGC16733 similar to CG12113                              | BC009955  | MGC16733 | 0.39   |
| hypothetical protein MGC4189                                               | BC004451  | MGC4189  | 2.46   |
| hypothetical protein MGC5309                                               | BC003353  | MGC5309  | 0.61   |
| hypothetical protein MGC5370                                               | BC006795  | MGC5370  | 0.28   |
| hypothetical protein MGC5590                                               | NM_024058 | MGC5590  | 0.45   |
| hypothetical protein MGC8721                                               | BC015012  | MGC8721  | 106.35 |
| microchidia homolog (mouse)                                                | NM_014429 | MORC     | 0.28   |
| mitochondrial ribosomal protein L30                                        | NM_016503 | MRPL30   | 0.59   |
| mitochondrial ribosomal protein L51                                        | NM_016497 | MRPL51   | 0.70   |
| mitochondrial ribosomal protein S6                                         | NM_032476 | MRPS6    | 0.57   |
| membrane-spanning 4-domains, subfamily A, member 6A                        | NM_022349 | MS4A6A   | 2.52   |
| microsomal triglyceride transfer protein (large polypeptide, 88kDa)        | NM_000253 | MTP      | 1.01   |
| myeloid differentiation primary response gene (88)                         | BC013589  | MYD88    | 0.87   |
| NADH dehydrogenase (ubiquinone) 1 beta subcomplex, 4, 15kDa                | BC000855  | NDUFB4   | 46.70  |
| nuclear factor I/B                                                         | BC001283  | NFIB     | 0.78   |
| putative small membrane protein NID67                                      | BC009719  | NID67    | 0.51   |
| neurotatin                                                                 | NM_005386 | NNAT     | 3.87   |
| putative nucleolar RNA helicase                                            | NM_013082 | NOH61    |        |
| ovarian carcinoma immunoreactive antigen                                   | BC003409  | OClA     | 2.54   |
| oxysterol binding protein-like 2                                           | NM_014835 | OSBP2    | 0.58   |
| hypothetical protein P1 p373c6                                             | BC014031  | P1P373C6 | 0.74   |
| prostate cancer associated protein 7                                       | AL137559  | PCANAP7  |        |
| protocadherin gamma subfamily A, 4                                         | NM_018917 | PCDHGA4  | 0.79   |
| hypothetical protein MGC1346                                               | NM_032758 | PHF5A    | 2.92   |
| plasminogen-like                                                           | BC005379  | PLGL     | 3.64   |
| phosphomevalonate kinase                                                   | BC007694  | PMVK     | 5.58   |
| PR domain containing 4                                                     | NM_012406 | PRDM4    | 2.05   |
| protein kinase C substrate 80K-H                                           | NM_002743 | PRKCSH   | 32.82  |
| protein kinase, cGMP-dependent, type II                                    | NM_006259 | PRKG2    | 2.27   |
| pleiotrophin (heparin binding growth factor 8, neurite growth-promo        | NM_002825 | PTN      | 2.56   |
| RNA binding motif protein 3                                                | BC006825  | RBM3     | 0.36   |
| putative c-Myc-responsive                                                  | BC011683  | RCL      | 0.55   |
| replication initiation region protein (60kD)                               | BC001760  | RIP60    | 0.23   |
| ribosomal protein L10a                                                     | BC011366  | RPL10A   | 0.40   |
| serum amyloid A4, constitutive                                             | NM_006512 | SAA4     |        |
| sterol-C4-methyl oxidase-like                                              | BC010653  | SC4MOL   | 1.52   |
| splicing factor, arginine/serine-rich 1 (splicing factor 2, alternate spli | BC010264  | SFRS1    | 0.53   |
| splicing factor, arginine/serine-rich 10 (transformer 2 homolog, Dros      | BC000160  | SFRS10   | 0.34   |
| sialyltransferase 9 (CMP-NeuAc:lactosylceramide alpha-2,3-sialyltr         | NM_003896 | SIAT9    | 3.06   |
| solute carrier family 25 (mitochondrial deoxynucleotide carrier), mem      | BC005120  | SLC25A19 | 0.19   |
| NS1-associated protein 1                                                   | BC005110  | SNX14    | 0.16   |
| taste receptor, type 2, member 14                                          | NM_023922 | TAS2R14  | 0.34   |
| TBC1 domain family, member 5                                               | NM_014744 | TBC1D5   |        |
| tumor necrosis factor receptor superfamily, member 6                       | BC012479  | TNFRSF6  | 0.26   |
| testis specific protein 1 (probe H4-1 p3-1)                                | NM_003296 | TPX1     | 0.50   |
| ubiquitin D                                                                | BC012472  | UBD      | 4.06   |
| ubiquitin carboxyl-terminal esterase L1 (ubiquitin thiolesterase)          | BC006305  | UCHL1    | 2.18   |
| WD repeat domain 4                                                         | BC006341  | WDR4     | 0.35   |
| ribosomal protein, large, P0                                               | BC000673  |          | 2.33   |
| Homo sapiens, clone MGC:15887 IMAGE:3530481, mRNA, complete                | BC009447  |          | 0.51   |
| Homo sapiens, clone MGC:10077 IMAGE:3896690, mRNA, complete                | BC010732  |          | 0.26   |
| ESTs                                                                       | AI125564  |          |        |
| ESTs, Weakly similar to hypothetical protein FLJ20489 [Homo sapier         | AI733650  |          |        |
| ESTs, Weakly similar to PIHUB6 salivary proline-rich protein precurs       | BG538389  |          |        |

|                                                                                         | Gene Name                                                                            | Acc#                                           | ChIP enrich | Induced Expression | Highest Scoring HSE |                |
|-----------------------------------------------------------------------------------------|--------------------------------------------------------------------------------------|------------------------------------------------|-------------|--------------------|---------------------|----------------|
| BOUND & INDUCED                                                                         | 46 hypothetical protein FLJ13063                                                     | BC014945                                       | 12.68       | 89.65              | TTCTGGGCTGTTCC      |                |
|                                                                                         | heat shock 70kDa protein 1A                                                          | NM_005345                                      | 245.65      | 58.54              | TACTGGAAAGTTCC      |                |
|                                                                                         | DnaJ (Hsp40) homolog, subfamily B, member 1                                          | NM_006145                                      | 17.12       | 38.72              | CTCTGGGAAGCTTCC     |                |
|                                                                                         | heat shock 27kDa protein 2                                                           | NM_001541                                      | 22.12       | 34.90              | TCCTGGAAACTTCT      |                |
|                                                                                         | serine (or cysteine) proteinase inhibitor, clade H (heat shock protein 47), member 2 | NM_001235                                      | 111.29      | 21.53              | TTCCAGAAAGTTTCC     |                |
|                                                                                         | heat shock 70kDa protein 6 (HSP70B')                                                 | NM_002155                                      | 312.89      | 20.59              | TTCCGGAAGTTCCG      |                |
|                                                                                         | mitochondrial ribosomal protein L18                                                  | NM_014161                                      | 67.66       | 17.16              | TTCTAGAAGGCACT      |                |
|                                                                                         | chromosome 6 open reading frame 37                                                   | NM_017633                                      | 16.75       | 17.09              | TTCTCGAAACCTCG      |                |
|                                                                                         | heat shock protein (hsp110 family)                                                   | NM_014278                                      | 23.07       | 14.45              | TTCCGAGAAAGATCT     |                |
|                                                                                         | heat shock 105kD                                                                     | NM_006644                                      | 653.34      | 13.40              | TTCTGGAAAGTTCT      |                |
|                                                                                         | tumor necrosis factor receptor superfamily, member 21                                | BC005192                                       | 31.39       | 10.63              | TTCTGGAAATTAAT      |                |
|                                                                                         | heat shock 27kDa protein 1                                                           | NM_001540                                      | 174.23      | 10.11              | ATCTGGAACTTCT       |                |
|                                                                                         | relaxin 1 (H1)                                                                       | BC005956                                       | 58.72       | 9.96               | ACCCTGAAACAAT       |                |
|                                                                                         | death effector domain-containing DNA binding protein 2                               | BC013372                                       | 13.98       | 6.44               | TTCTGGCACCTTCT      |                |
|                                                                                         | collagen, type IV, alpha 6                                                           | NM_033641                                      | 6.07        | 5.69               | TTCTTGAAGATTCT      |                |
|                                                                                         | FK506 binding protein 4, 59kDa                                                       | NM_002014                                      | 6.28        | 5.24               | CTCTAGAAAGTTCT      |                |
|                                                                                         | hypothetical protein FLJ22693                                                        | NM_022750                                      | 9.26        | 4.95               | TTCTGGAAAGTTCC      |                |
|                                                                                         | crystallin, beta A4                                                                  | NM_001886                                      | 29.57       | 4.68               | ACCTGGGACTTACC      |                |
|                                                                                         | ubiquitin B                                                                          | BC015127                                       | 347.68      | 4.46               | CTCTGGAAACTTCC      |                |
|                                                                                         | ribosomal protein S14                                                                | BC006784                                       | 6.54        | 3.85               | CCCCAGAACTACC       |                |
|                                                                                         | hypothetical protein MGC10814                                                        | NM_032671                                      | 16.49       | 3.79               | TTCTAGAAAGTTCT      |                |
|                                                                                         | GPI anchored molecule like protein                                                   | NM_002066                                      | 55.60       | 3.75               | TTCTAGAACATTCC      |                |
|                                                                                         | DnaJ (Hsp40) homolog, subfamily B, member 6                                          | NM_005494                                      | 70.75       | 3.68               | TTCCGGAAGCTTCT      |                |
|                                                                                         | heat shock 70kDa protein 1-like                                                      | NM_005527                                      | 238.60      | 3.47               | TACTGGAAAGTTTCC     |                |
|                                                                                         | glioblastoma amplified sequence                                                      | BC001837                                       | 35.49       | 3.42               | CTCTGGGACAGTCT      |                |
|                                                                                         | MHC class I polypeptide-related sequence A                                           | NM_000247                                      | 45.89       | 3.34               | CACTGGAATTTTCT      |                |
|                                                                                         | G protein-coupled receptor 4                                                         | NM_005282                                      | 44.42       | 3.29               | TTCCAGAACCTTCT      |                |
|                                                                                         | hypothetical protein LOC63929                                                        | NM_022098                                      | 159.88      | 3.14               |                     |                |
|                                                                                         | heat shock 90kDa protein 1, beta                                                     | NM_007355                                      | 220.28      | 2.96               | TTCTGGAAAGCTTCT     |                |
|                                                                                         | Siah-interacting protein                                                             | BC005975                                       | 60.99       | 2.94               | ATCTCGAACCTTCC      |                |
|                                                                                         | hypothetical protein P15-2                                                           | NM_018698                                      | 241.38      | 2.92               | TTCTGGAAAGTTTCC     |                |
|                                                                                         | TAF7 RNA polymerase II, TATA box binding protein (TBP)-associated factor, 55kDa      | NM_005642                                      | 116.50      | 2.81               | TTCTGGAAACTTCT      |                |
|                                                                                         | suppressor of G2 allele of SKP1, S. cerevisiae, homolog of                           | NM_006704                                      | 13.18       | 2.72               | CTCCAGAAAGTTTCC     |                |
|                                                                                         | hypothetical protein MGC8721                                                         | NM_016127                                      | 41.74       | 2.66               | TTCCGGAAGCTTCT      |                |
|                                                                                         | chromosome 14 open reading frame 3                                                   | NM_012111                                      | 36.45       | 2.56               | TTCTAGTAGTTTCC      |                |
|                                                                                         | myotubularin related protein 8                                                       | BC012399                                       | 5.92        | 2.52               | CTCTTGGCTCCTCC      |                |
|                                                                                         | stress-induced-phosphoprotein 1 (Hsp70/Hsp90-organizing protein)                     | BC002987                                       | 226.45      | 2.48               | TTCTGGAAACTTCC      |                |
|                                                                                         | coagulation factor VIII, procoagulant component (hemophilia A)                       | NM_000132                                      | 21.39       | 2.19               | TTCTAGAATCTTCC      |                |
|                                                                                         | suppression of tumorigenicity 13 (colon carcinoma) (Hsp70 interacting protein)       | NM_003932                                      | 174.17      | 2.17               | TTCTAGAAGATTCT      |                |
|                                                                                         | hypothetical protein FLJ10830                                                        | BC003176                                       | 21.30       | 2.15               | ATCTCGAAGTTTCT      |                |
|                                                                                         | heat shock 10kDa protein 1 (chaperonin 10)                                           | NM_002157                                      | 154.26      | 2.14               | TTCTGGAAAGTTTCC     |                |
|                                                                                         | fragile X mental retardation, autosomal homolog 1                                    | NM_005087                                      | 26.53       | 2.06               | CTCTTGCATTTTCC      |                |
|                                                                                         | fibroblast growth factor 18                                                          | BC006245                                       | 8.01        | 2.03               |                     |                |
|                                                                                         | cysteine and histidine-rich domain (CHORD)-containing, zinc binding protein 1        | NM_012124                                      | 104.88      | 2.03               | TTCCGGAAGTTTCC      |                |
|                                                                                         | frizzled homolog 4 (Drosophila)                                                      | NM_012193                                      | 15.20       | 1.97               | CCCCGGGACGCTCG      |                |
|                                                                                         | heat shock 60kDa protein 1 (chaperonin)                                              | NM_002156                                      | 415.79      | 1.95               | TTCTGGAAAGTTTCC     |                |
|                                                                                         | INDUCED NOT BOUND                                                                    | 24 DnaJ (Hsp40) homolog, subfamily C, member 3 | NM_006260   | 0.52               | 49.76               | TTCCAGAAATTTCA |
|                                                                                         |                                                                                      | hypothetical protein DKFZp56410422             | NM_031435   | 1.83               | 18.86               | ACCCAGCAGCTACC |
|                                                                                         |                                                                                      | DnaJ (Hsp40) homolog, subfamily B, member 4    | NM_007034   | 0.76               | 14.67               | TACCCGAAAGTACC |
|                                                                                         |                                                                                      | N-acetylated alpha-linked acidic dipeptidase 2 | NM_005467   | 0.33               | 12.29               | TTTGGAAATGTTCC |
| Homo sapiens mRNA; cDNA DKFZp434B102 (from clone DKFZp434B102)                          |                                                                                      | BC030800                                       | 0.39        | 11.68              | TTTGGGAGTTTCT       |                |
| solute carrier family 28 (sodium-coupled nucleoside transporter), member 1              |                                                                                      | NM_004213                                      | 0.20        | 6.56               | CTCCTGGACTTTCC      |                |
| DKFZP43411735 protein                                                                   |                                                                                      | AB037737                                       | 0.30        | 5.88               |                     |                |
| crystallin, mu                                                                          |                                                                                      | NM_001888                                      | 4.37        | 5.60               | TTCCAGGAGTTTTT      |                |
| protein kinase anchoring protein GKAP42                                                 |                                                                                      | NM_025211                                      | 0.24        | 4.14               | CTCCAGAAATTTCC      |                |
| fucosyltransferase 1 (galactoside 2-alpha-L-fucosyltransferase, Bombay phenotype includ |                                                                                      | NM_000148                                      | 0.65        | 3.24               | TACTGGACTTCTCC      |                |
| heat shock 27kDa protein 3                                                              |                                                                                      | NM_006308                                      | 0.32        | 3.19               | ATCTGGAGATTCT       |                |
| cysteine-rich, angiogenic inducer, 61                                                   |                                                                                      | BC009199                                       | 1.70        | 3.18               |                     |                |
| protein kinase C, alpha                                                                 |                                                                                      | NM_002737                                      | 0.35        | 3.16               | CTCGTGACGTTTCT      |                |
| hypothetical protein FLJ20558                                                           |                                                                                      | NM_017880                                      | 1.04        | 3.04               | TCCCGGCATCCTCC      |                |
| nuclear receptor coactivator 3                                                          |                                                                                      | NM_006534                                      | 1.63        | 2.62               | TTCTGGGAGCACC       |                |
| brain-specific protein p25 alpha                                                        |                                                                                      | NM_007030                                      | 0.62        | 2.62               | CTCTGGAAAGTTCC      |                |
| PR domain containing 2, with ZNF domain                                                 |                                                                                      | NM_012231                                      | 0.47        | 2.38               | TTCCACCAAGTTCT      |                |
| CDC-like kinase 4                                                                       |                                                                                      | NM_020666                                      | 0.36        | 2.32               | TTCTCAAATTTCTCC     |                |
| VCY2 interacting protein 1                                                              |                                                                                      | BC008806                                       | 0.47        | 2.18               | CTCCGGAAGCTTCT      |                |
| crystallin, gamma D                                                                     |                                                                                      | NM_006891                                      | 3.76        | 2.06               | TCCCAGCACTTTCC      |                |
| crystallin, beta A1                                                                     |                                                                                      | NM_005208                                      | 0.74        | 2.06               | CCCTAGAAGGCTCT      |                |
| crystallin, beta B3                                                                     |                                                                                      | NM_004076                                      | 0.28        | 2.04               | TCCCAGAAATGAACC     |                |
| crystallin, gamma A                                                                     |                                                                                      | NM_014617                                      | 1.18        | 1.99               | TTCTGGCATTTTCC      |                |
| Homo sapiens, clone MGC:15478 IMAGE:2967661, mRNA, complete cds                         |                                                                                      | BC010426                                       | 1.11        | 1.97               | CCCTCGGAGCTTCT      |                |
| BOUND NOT INDUCED                                                                       | 48 DnaJ (Hsp40) homolog, subfamily A, member 1                                       | NM_001539                                      | 325.10      | 1.76               | TTCTGGAAAGTTCC      |                |
|                                                                                         | CD48 antigen (B-cell membrane protein)                                               | BC016182                                       | 196.45      | 1.26               | TTCCAGCCTCTTCT      |                |
|                                                                                         | heat shock 70kDa protein 8                                                           | NM_006597                                      | 191.34      | 1.83               | TTCTGGAAAGTTTCT     |                |
|                                                                                         | nucleolar protein NOPS/NOP58                                                         | NM_015934                                      | 158.68      | 1.30               | TTCCAGAAATGTTCC     |                |
|                                                                                         | diacylglycerol kinase, epsilon 64kDa                                                 | NM_003647                                      | 124.74      | 1.26               | TTCCAGAAATTTTCT     |                |
|                                                                                         | chaperonin containing TCP1, subunit 4 (delta)                                        | NM_006430                                      | 108.93      | 1.77               | TTCTGGAAAGTTCCG     |                |
|                                                                                         | hypothetical protein FLJ10482                                                        | NM_018107                                      | 87.16       | 1.28               | TTCCAGAACTTCC       |                |
|                                                                                         | Huntingtin interacting protein K                                                     | NM_016400                                      | 85.42       | 1.01               | TCCTGAAAGCTTCT      |                |
|                                                                                         | inactive progesterone receptor, 23 kD                                                | BC003005                                       | 80.55       | 1.50               | CCCCAGAAATGCACC     |                |
|                                                                                         | retinoblastoma binding protein 2                                                     | NM_005056                                      | 72.94       | 1.89               | TTCCGGAAGTTTACC     |                |
|                                                                                         | ferritin, light polypeptide                                                          | BC004245                                       | 70.46       | 1.00               | CTCTGGAAAGCTTCC     |                |
|                                                                                         | splicing factor, arginine/serine-rich 10 (transformer 2 homolog, Drosophila)         | BC005898                                       | 70.26       | 1.07               | TTCTAGAACTTTCC      |                |
|                                                                                         | BBP-like protein 2                                                                   | BC008873                                       | 60.77       | 0.80               | TTCCAGAAAGTTCC      |                |
|                                                                                         | chromosome 21 open reading frame 51                                                  | NM_058182                                      | 55.88       | 0.74               | TTCTTGAAGTTTCT      |                |
|                                                                                         | heterogeneous nuclear ribonucleoprotein A2/B1                                        | NM_002137                                      | 55.24       | 1.60               | TTCTAGAAGCTTCC      |                |
|                                                                                         | serine hydrolase-like                                                                | NM_014509                                      | 54.05       | 1.67               | TTCTAGAAGGTTCT      |                |
|                                                                                         | heat shock 70kDa protein 9B (mortalin-2)                                             | BC000478                                       | 48.40       | 1.22               | TTCTGGAAAGCTTCC     |                |
|                                                                                         | Homo sapiens, clone MGC:27375 IMAGE:4688423, mRNA, complete cds                      | BC017422                                       | 46.55       | 1.24               | ATCTTGAATTTTCT      |                |
|                                                                                         | hypothetical protein MGC21990                                                        | BC015422                                       | 45.95       | 0.79               | CCCCGGGAGCTTCT      |                |
|                                                                                         | ribosomal protein L34                                                                | NM_033625                                      | 45.91       | 1.22               | TTCAAGAAGCTTCC      |                |
|                                                                                         | eukaryotic translation initiation factor 5                                           | BC007728                                       | 38.47       | 0.94               |                     |                |

|                       |                                                                                         |           |       |      |                 |
|-----------------------|-----------------------------------------------------------------------------------------|-----------|-------|------|-----------------|
|                       | ATPase, Ca++ transporting, type 2C, member 1                                            | NM_014382 | 33.12 | 1.77 | TTCTAGAAACTTCC  |
|                       | synaptosomal-associated protein, 23kDa                                                  | BC000148  | 30.44 | 1.41 | TTCTGGAAATTCT   |
|                       | nucleoporin 88kDa                                                                       | BC000335  | 28.71 | 0.86 | ATCCAGAACTTTCC  |
|                       | eukaryotic translation initiation factor 2B, subunit 5 epsilon, 82kDa                   | BC013590  | 26.71 | 1.24 |                 |
|                       | Homo sapiens, Similar to histamine N-methyltransferase, clone MGC:14500 IMAGE:424E      | BC005907  | 23.00 | 1.08 |                 |
|                       | carboxypeptidase E                                                                      | NM_001873 | 19.95 | 1.89 | TTCTGGAATATTCT  |
|                       | DNA (cytosine-5)-methyltransferase 2                                                    | NM_004412 | 19.35 | 0.81 | TTCTGGAACTTCT   |
|                       | interferon, alpha 16                                                                    | NM_002173 | 19.22 | 0.75 | TTTCATGAAGATTCC |
|                       | hypothetical protein MGC2474                                                            | BC001361  | 19.18 | 1.02 | TTCTGGGAGCTTCT  |
|                       | guanine nucleotide binding protein 4                                                    | NM_004485 | 18.65 | 1.10 | TTCTGGAACTTCT   |
|                       | microsomal glutathione S-transferase 1                                                  | BC005923  | 17.70 | 0.94 | TTCTCGAACATTTCC |
|                       | hypothetical protein FLJ20422                                                           | BC005210  | 17.37 | 1.26 |                 |
|                       | KIAA0721 protein                                                                        | BC009116  | 16.37 | 1.60 | TTCCAGACCTTTCCG |
|                       | tRNA isopentenylpyrophosphate transferase                                               | NM_017646 | 16.14 | 1.05 | TTCTAGAACTTCT   |
|                       | aconitase 2, mitochondrial                                                              | NM_001098 | 14.67 | 0.84 | TTCCCGAAGCTTCC  |
|                       | tumor-associated calcium signal transducer 1                                            | NM_002354 | 12.80 | 1.22 | TTCTGGAAGTTCT   |
|                       | KIAA0999 protein                                                                        | NM_025164 | 12.69 | 1.54 | TACCAGAACCTTCC  |
|                       | MORF-related gene X                                                                     | NM_012286 | 11.75 | 1.94 | CACGTGAACATTTCC |
|                       | hypothetical protein FLJ10352                                                           | NM_032142 | 11.47 | 0.79 | TTCTGGAATTTTCC  |
|                       | ribosomal protein L10a                                                                  | BC006791  | 10.56 | 1.23 | TTCTCGAAGGTTC   |
|                       | forkhead box J1                                                                         | NM_001454 | 9.76  | 1.67 | TTCCAGAACCTTCC  |
|                       | peptidylprolyl isomerase D (cyclophilin D)                                              | NM_005038 | 8.93  | 1.85 | TTCTGGAAATTCT   |
|                       | H19, imprinted maternally expressed untranslated mRNA                                   | BC007513  | 8.19  | 0.84 |                 |
|                       | hypothetical protein FLJ22369                                                           | NM_032221 | 7.72  | 1.01 | TTCTAGAAATTTTCT |
|                       | hypothetical protein MGC4308                                                            | NM_032359 | 7.29  | 1.20 | TTCTAGAAAGTTCT  |
|                       | peroxiredoxin 3                                                                         | BC008038  | 6.34  | 0.66 | TCCGGGAAGGTTC   |
|                       | chromosome 22 open reading frame 2                                                      | BC016139  | 5.15  | 1.11 | TACTAGAAAATTTCC |
| NOT BOUND NOT INDUCED | catenin, beta interacting protein 1                                                     | BC014300  | 4.92  | 1.14 | CTCTAGGAACACC   |
| 58                    | crystallin, alpha B                                                                     | BC007008  | 4.31  |      | TCCTGGAAACTTCT  |
|                       | activating transcription factor 5                                                       | BC005174  | 2.64  | 0.59 |                 |
|                       | hypothetical protein HSPC228                                                            | BC005937  | 2.46  | 0.89 | CCCCAGAAGAAACC  |
|                       | inhibitor of growth family, member 3                                                    | BC009777  | 2.40  | 0.67 | AACCTGCAGCCTCG  |
|                       | signal recognition particle 54kDa                                                       | BC003389  | 1.64  | 0.93 | CCCCCGGACTTCT   |
|                       | hypothetical protein MGC3036                                                            | BC001354  | 1.56  | 1.05 | TTCCGGAAGATTCT  |
|                       | hypothetical protein HSPC219                                                            | BC002863  | 1.51  | 0.99 | TTCTGGAGACTTCT  |
|                       | DnaJ (Hsp40) homolog, subfamily B, member 12                                            | NM_017626 | 1.30  | 0.78 | CTCCGGAAGCTTCG  |
|                       | mutS homolog 5 (E. coli)                                                                | BC001358  | 1.22  | 0.65 | CTCTAGCACTCACT  |
|                       | ATPase inhibitor precursor                                                              | BC001867  | 1.21  | 1.07 |                 |
|                       | dystonia 1, torsion (autosomal dominant; torsin A)                                      | BC000674  | 1.14  | 0.65 | TCCTGCAATTTC    |
|                       | heat shock 70kDa protein 5 (glucose-regulated protein, 78kDa)                           | NM_005347 | 1.07  | 1.49 | CCCGAGGCATTTCC  |
|                       | MBD2 (methyl-CpG-binding protein)-interacting zinc finger protein                       | BC001073  | 1.05  | 1.17 | TTCTAGACTTCT    |
|                       | DnaJ (Hsp40) homolog, subfamily B, member 11                                            | NM_016306 | 1.01  | 1.17 | TCCTCGGACTTTCC  |
|                       | DnaJ (Hsp40) homolog, subfamily C, member 4                                             | NM_005528 | 0.94  | 0.84 | ACCTGGGAGCTTCC  |
|                       | crystallin, beta B2                                                                     | NM_000496 | 0.94  | 1.86 | TTCCAGGCTTTTCC  |
|                       | similar to arginyl-tRNA synthetase                                                      | BC010420  | 0.93  | 0.84 | TTACAGAAGATTCT  |
|                       | hypothetical protein FLJ10404                                                           | BC008784  | 0.92  | 1.12 | TCCTAGTACCTTCT  |
|                       | amplified in osteosarcoma                                                               | BC007254  | 0.91  | 1.11 | ACCTTGGAGCCACG  |
|                       | DnaJ (Hsp40) homolog, subfamily C, member 8                                             | NM_014280 | 0.88  | 0.97 | CCCGAGACTTCT    |
|                       | zinc finger protein 359                                                                 | BC007256  | 0.88  | 0.75 | TCCTGACTCTACC   |
|                       | hypothetical protein MGC4606                                                            | BC003640  | 0.80  | 0.49 | TCCTGGCCTTACC   |
|                       | DnaJ (Hsp40) homolog, subfamily C, member 6                                             | NM_014787 | 0.79  | 1.28 | TACTTGAATCTCC   |
|                       | hypothetical protein PRO1853                                                            | BC004548  | 0.77  | 0.87 | ACCTTGAAGTACC   |
|                       | chromosome 9 open reading frame 16                                                      | BC008887  | 0.72  | 0.99 | TTCCGGGACACTCG  |
|                       | peroxisomal membrane protein 2, 22kDa                                                   | BC009836  | 0.70  | 0.99 |                 |
|                       | DnaJ (Hsp40) homolog, subfamily B, member 9                                             | NM_012328 | 0.70  | 1.33 | CTCGGGCAGCTTCT  |
|                       | torsin family 1, member B (torsin B)                                                    | BC015578  | 0.61  | 0.91 | CTCGGGCAGCAGCT  |
|                       | hypothetical protein FLJ10468                                                           | BC001651  | 0.61  | 0.69 | TCCCGGAGCCTCC   |
|                       | thioredoxin                                                                             | NM_003329 | 0.60  | 1.43 | CTCCGGAATTTACC  |
|                       | excision repair cross-complementing rodent repair deficiency, complementation group 2 ( | BC008346  | 0.57  | 0.78 | CACGCGCAGTATCC  |
|                       | hypothetical protein BC008988                                                           | BC008988  | 0.57  | 1.29 | CTCTGGAACTTCT   |
|                       | crystallin, gamma S                                                                     | NM_017541 | 0.56  | 1.55 | ATCTTGAACCTTCT  |
|                       | stromal cell-derived factor 2                                                           | BC001406  | 0.53  | 0.81 | TCCAGACCACT     |
|                       | tumor rejection antigen (gp96) 1                                                        | BC009195  | 0.52  | 0.90 | TTCCAGGAGTCTCC  |
|                       | TAL1 (SCL) interrupting locus                                                           | NM_003035 | 0.52  | 1.87 | ACCTTGAATGCTCG  |
|                       | interleukin 8                                                                           | NM_000584 | 0.52  | 0.68 | TTCTGAATATTCT   |
|                       | DnaJ (Hsp40) homolog, subfamily B, member 5                                             | NM_012266 | 0.50  | 0.99 | CTCCGGAAGCTTCC  |
|                       | heat shock 70kDa protein 2                                                              | NM_021979 | 0.47  | 1.24 | CTCGTGAATTTTCT  |
|                       | carbohydrate (chondroitin 6) sulfotransferase 3                                         | NM_004273 | 0.46  | 1.87 | CTCCTGCATTTTCC  |
|                       | heat shock protein 75                                                                   | NM_016292 | 0.45  | 1.31 | CTCCTGGAGCTTCC  |
|                       | ATPase, H+ transporting, lysosomal 31kDa, V1 subunit E-like 2 isoform 2                 | BC008981  | 0.45  | 0.82 | CTCTAGAACTTTTCT |
|                       | cutaneous T-cell lymphoma tumor antigen se70-2                                          | BC000791  | 0.43  | 0.75 | AACCTGAATTTTCC  |
|                       | hypothetical protein FLJ22570                                                           | BC004867  | 0.39  | 0.50 | TTCTGGCCACTTCC  |
|                       | tripartite motif-containing 39                                                          | BC007661  | 0.37  | 0.60 |                 |
|                       | kelch-like protein C3IP1                                                                | BC004175  | 0.37  | 1.17 | TTACAGAAAATTTCT |
|                       | WD-repeat protein                                                                       | NM_005828 | 0.35  | 1.66 | TCCTGCACTTCC    |
|                       | WEE1+ homolog (S. pombe)                                                                | NM_003390 | 0.35  | 1.80 | CTCGGGACCTTCT   |
|                       | benzodiazepine receptor (peripheral)                                                    | BC001110  | 0.27  | 0.95 | ATCTGGACTTCT    |
|                       | homeodomain interacting protein kinase 3                                                | NM_005734 | 0.26  | 1.70 | TCCTTTAACTTCC   |
|                       | SBB126 protein                                                                          | NM_018846 | 0.24  | 1.87 | TTCTAGAAATCTTC  |
|                       | serine (or cysteine) proteinase inhibitor, clade B (ovalbumin), member 1                | BC009015  | 0.19  | 0.88 | TACTGGAACTTTGG  |
|                       | TEA domain family member 1 (SV40 transcriptional enhancer factor)                       | AL833289  | 0.18  | 1.93 |                 |
|                       | heat shock factor binding protein 1                                                     | BC007515  | 0.13  | 1.03 | TTCTGGAAGCTTCT  |
|                       | ribosomal protein S6                                                                    | BC009427  | 0.11  | 0.93 | TCCGTGGCCTCG    |
|                       | proliferation-associated 2G4, 38kDa                                                     | BC001951  | 0.07  | 0.94 | ACCTGGAAGCTTCT  |
|                       | Homo sapiens, clone MGC:9852 IMAGE:3865825, mRNA, complete cds                          | BC009051  | 0.01  | 1.26 |                 |

| ACC#      | Gene name                                          | Induced expression | bp separating TSS | ACC#          | Gene name                           | Induced expression | chr   |
|-----------|----------------------------------------------------|--------------------|-------------------|---------------|-------------------------------------|--------------------|-------|
| NM_003932 | suppression of tumorigenicity 13 (colon carcinoma) | 2.17               |                   | 414 NM_022098 | hypothetical protein LOC63929       | 3.14               | chr22 |
| BC000665  | t-complex 1                                        | 1.63               |                   | 880 NM_014161 | mitochondrial ribosomal protein L18 | 17.16              | chr6  |
| AK022769  | hypothetical protein FLJ12707                      | 1.82               |                   | 470 NM_012111 | chromosome 14 open reading frame 3  | 2.56               | chr14 |
| AK056363  | hypothetical protein MGC20983                      | 1.81               |                   | 566 NM_002743 | protein kinase C substrate 80K-H    |                    | chr19 |
| BC015679  | hypothetical protein MGC23401                      |                    |                   | 145 NM_031435 | hypothetical protein DKFZp564I0422  | 18.86              | chr12 |
| NM_031435 | hypothetical protein DKFZp564I0422                 | 18.86              |                   | 145 NM_144982 | hypothetical protein MGC23401       | 1.32               | chr3  |

Supplemental Table 1 – Complete data set of all genes considered for this study. The first column is the gene name. The second column is the accession number of the mRNA sequence used to measure the expression of the gene and to predict the promoter for the ChIP and luciferase experiments. The third column is the gene symbol. The fourth column is the HSF1 ChIP fold-enrichment measurement, and the last column is the fold-induced expression measurement as measured by real-time RT-PCR.

Supplemental Table 2 – Complete data set for the 176 genes assayed for both induced expression and HSF1 binding. The first column is the name of the category. The second column is the gene name. The third column is the accession number of the gene. The fourth column is the ChIP-enrichment measurement. The fifth column is the fold-induced expression measurement, and the last column is the highest scoring HSE in the promoter region of the gene as determined by the HSE PSSM evaluation.

Supplemental Table 3 – Heat shock genes arranged in an head-to-head orientation in the genome. This table describes the heat shock genes that use a potential bidirectional promoter. Included are the gene names, the induced expression measurements of each gene, the estimated distance between transcription start sites and the chromosome on which the pair is located.
